# Supplementary material
Source: Springer Nature journal article supplement (https://www.springermedizin.de/resource/supplementary/13033_2012_135_MOESM4_ESM.pdf/9651916)

### Khat use last month

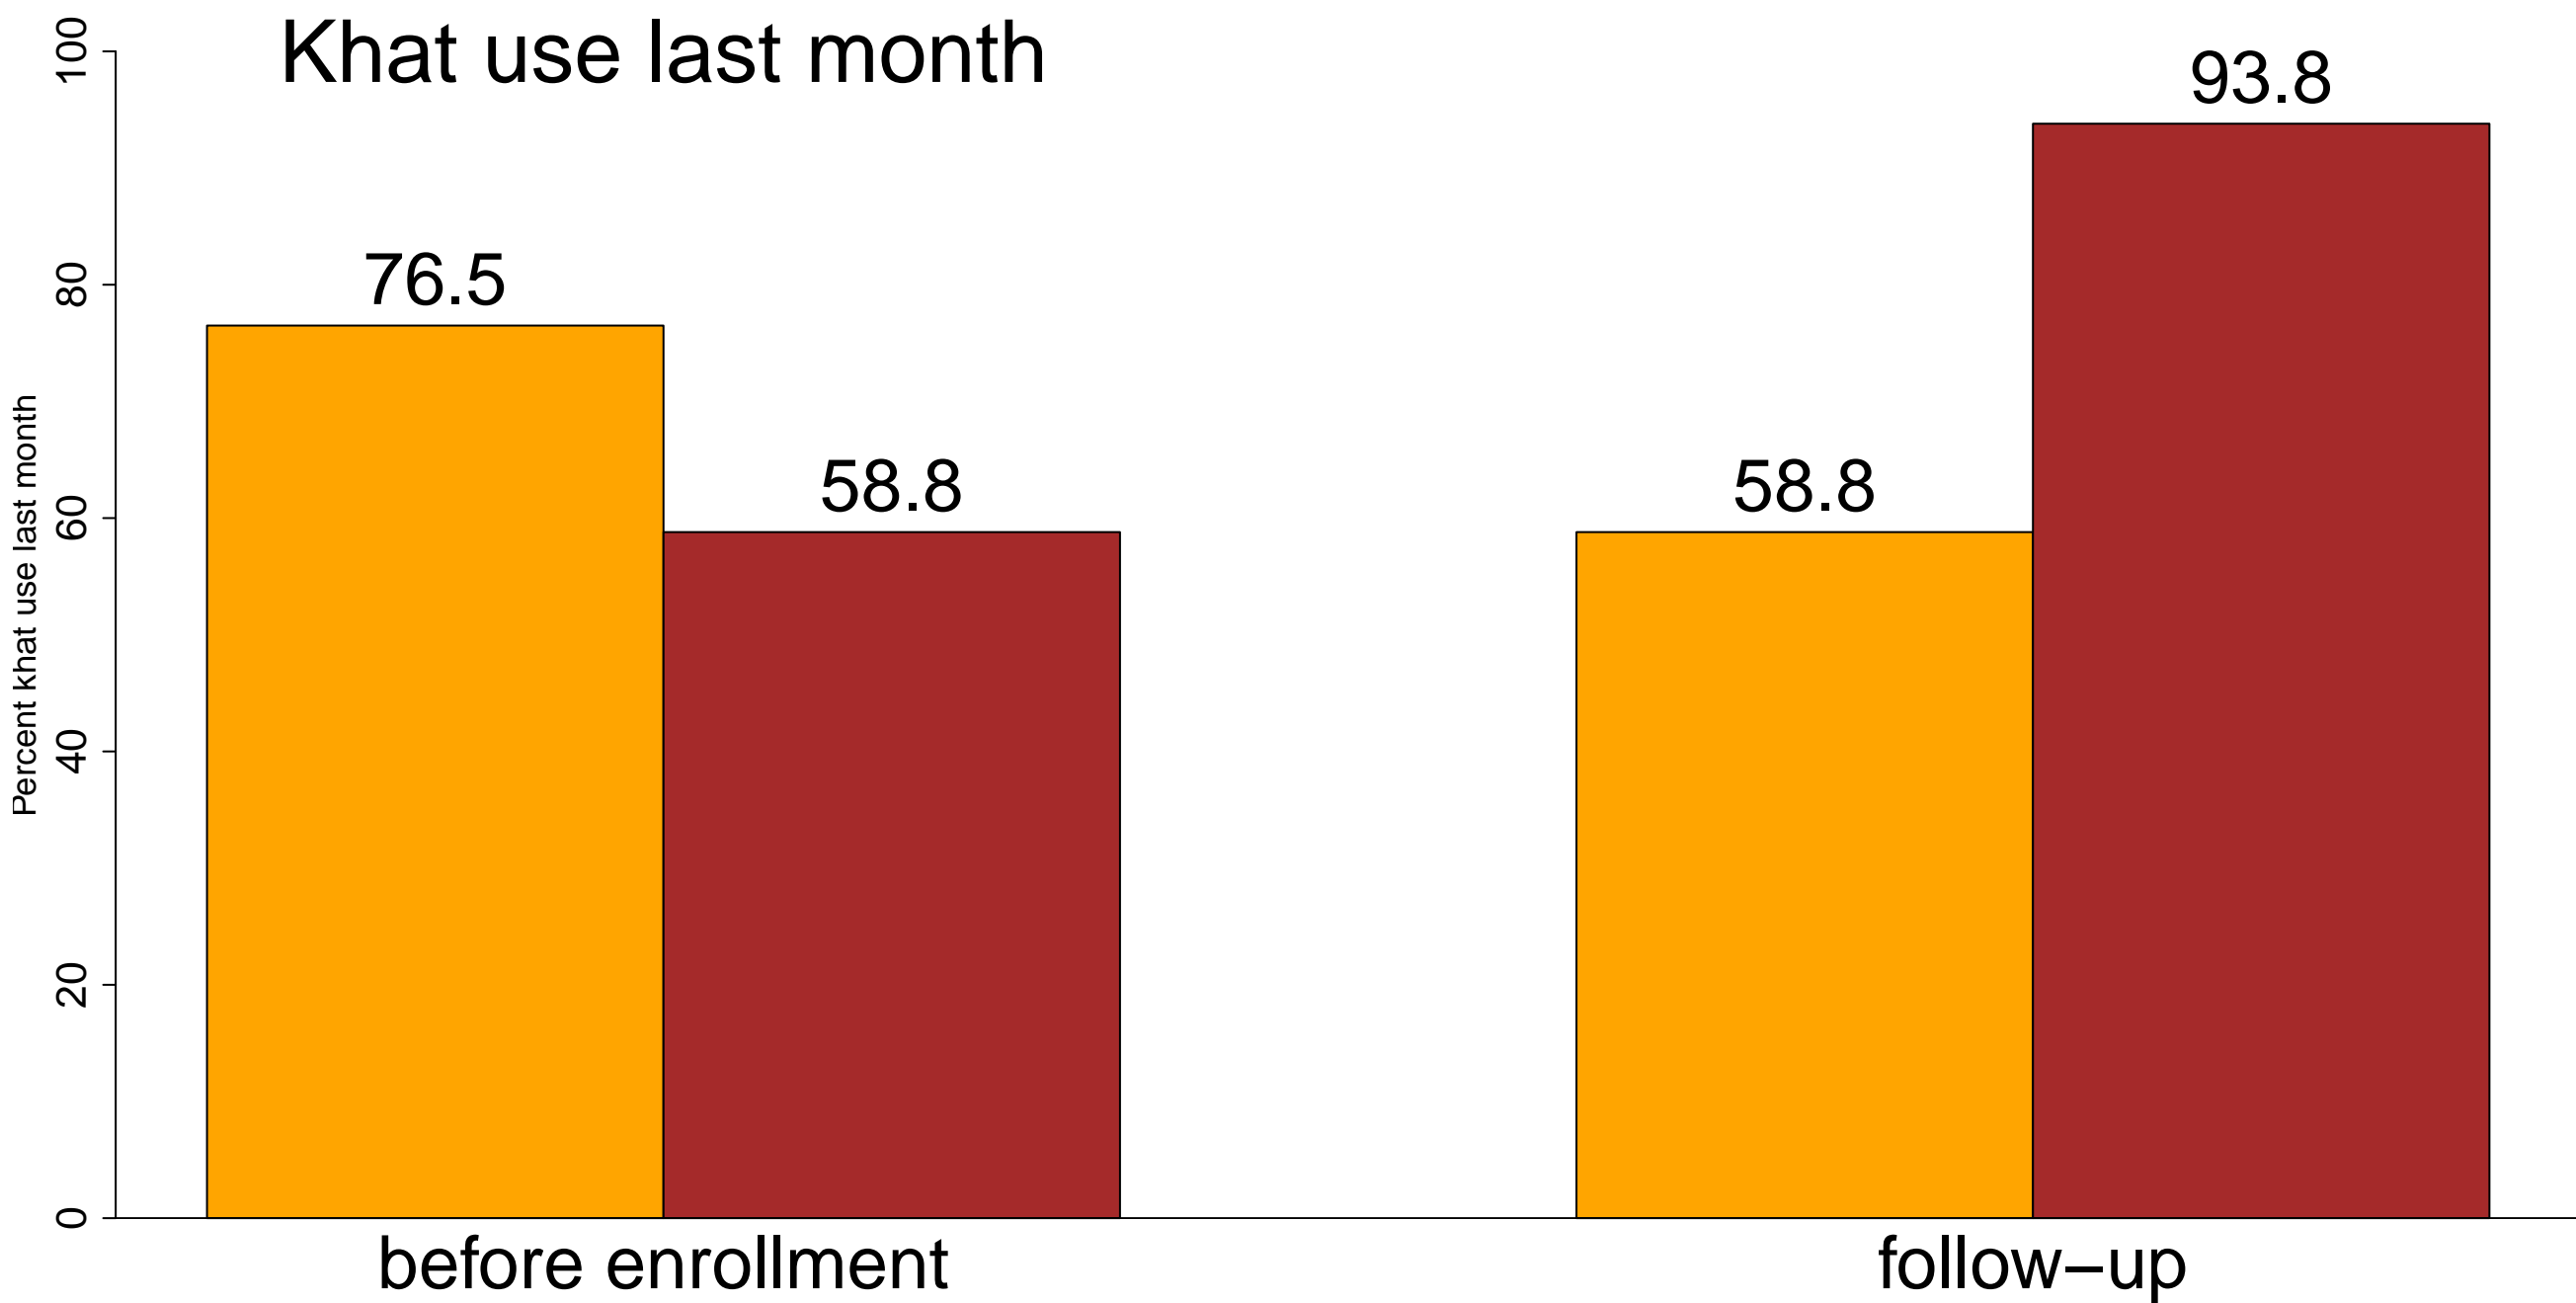

### Days of khat use last week

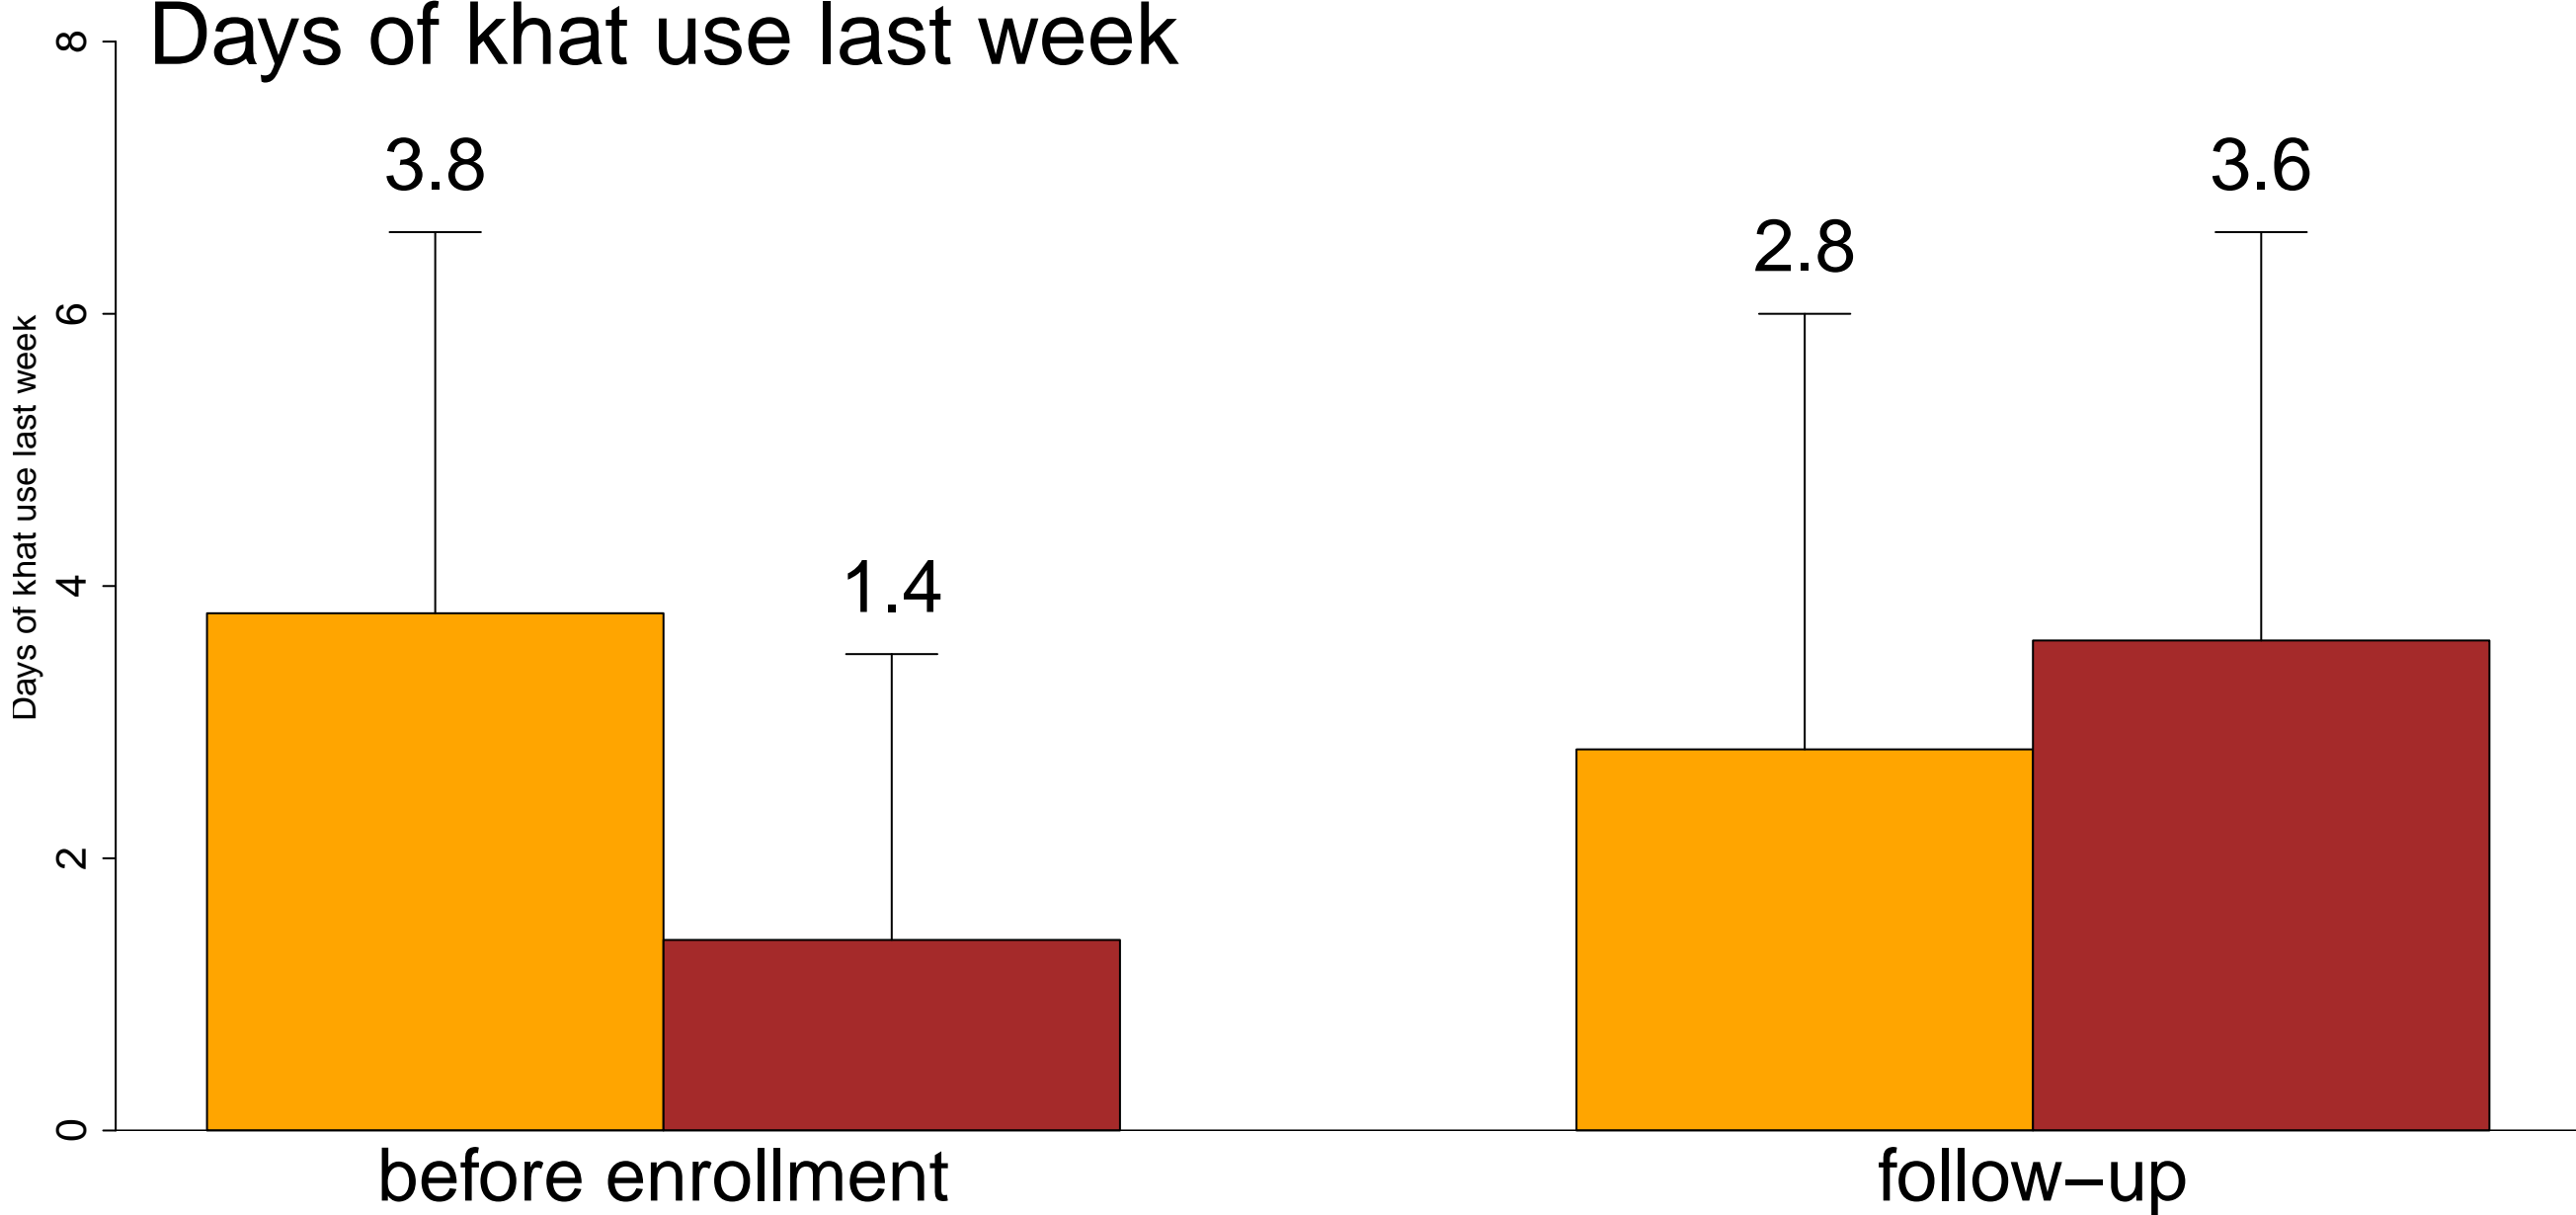

### Khat bundles last week

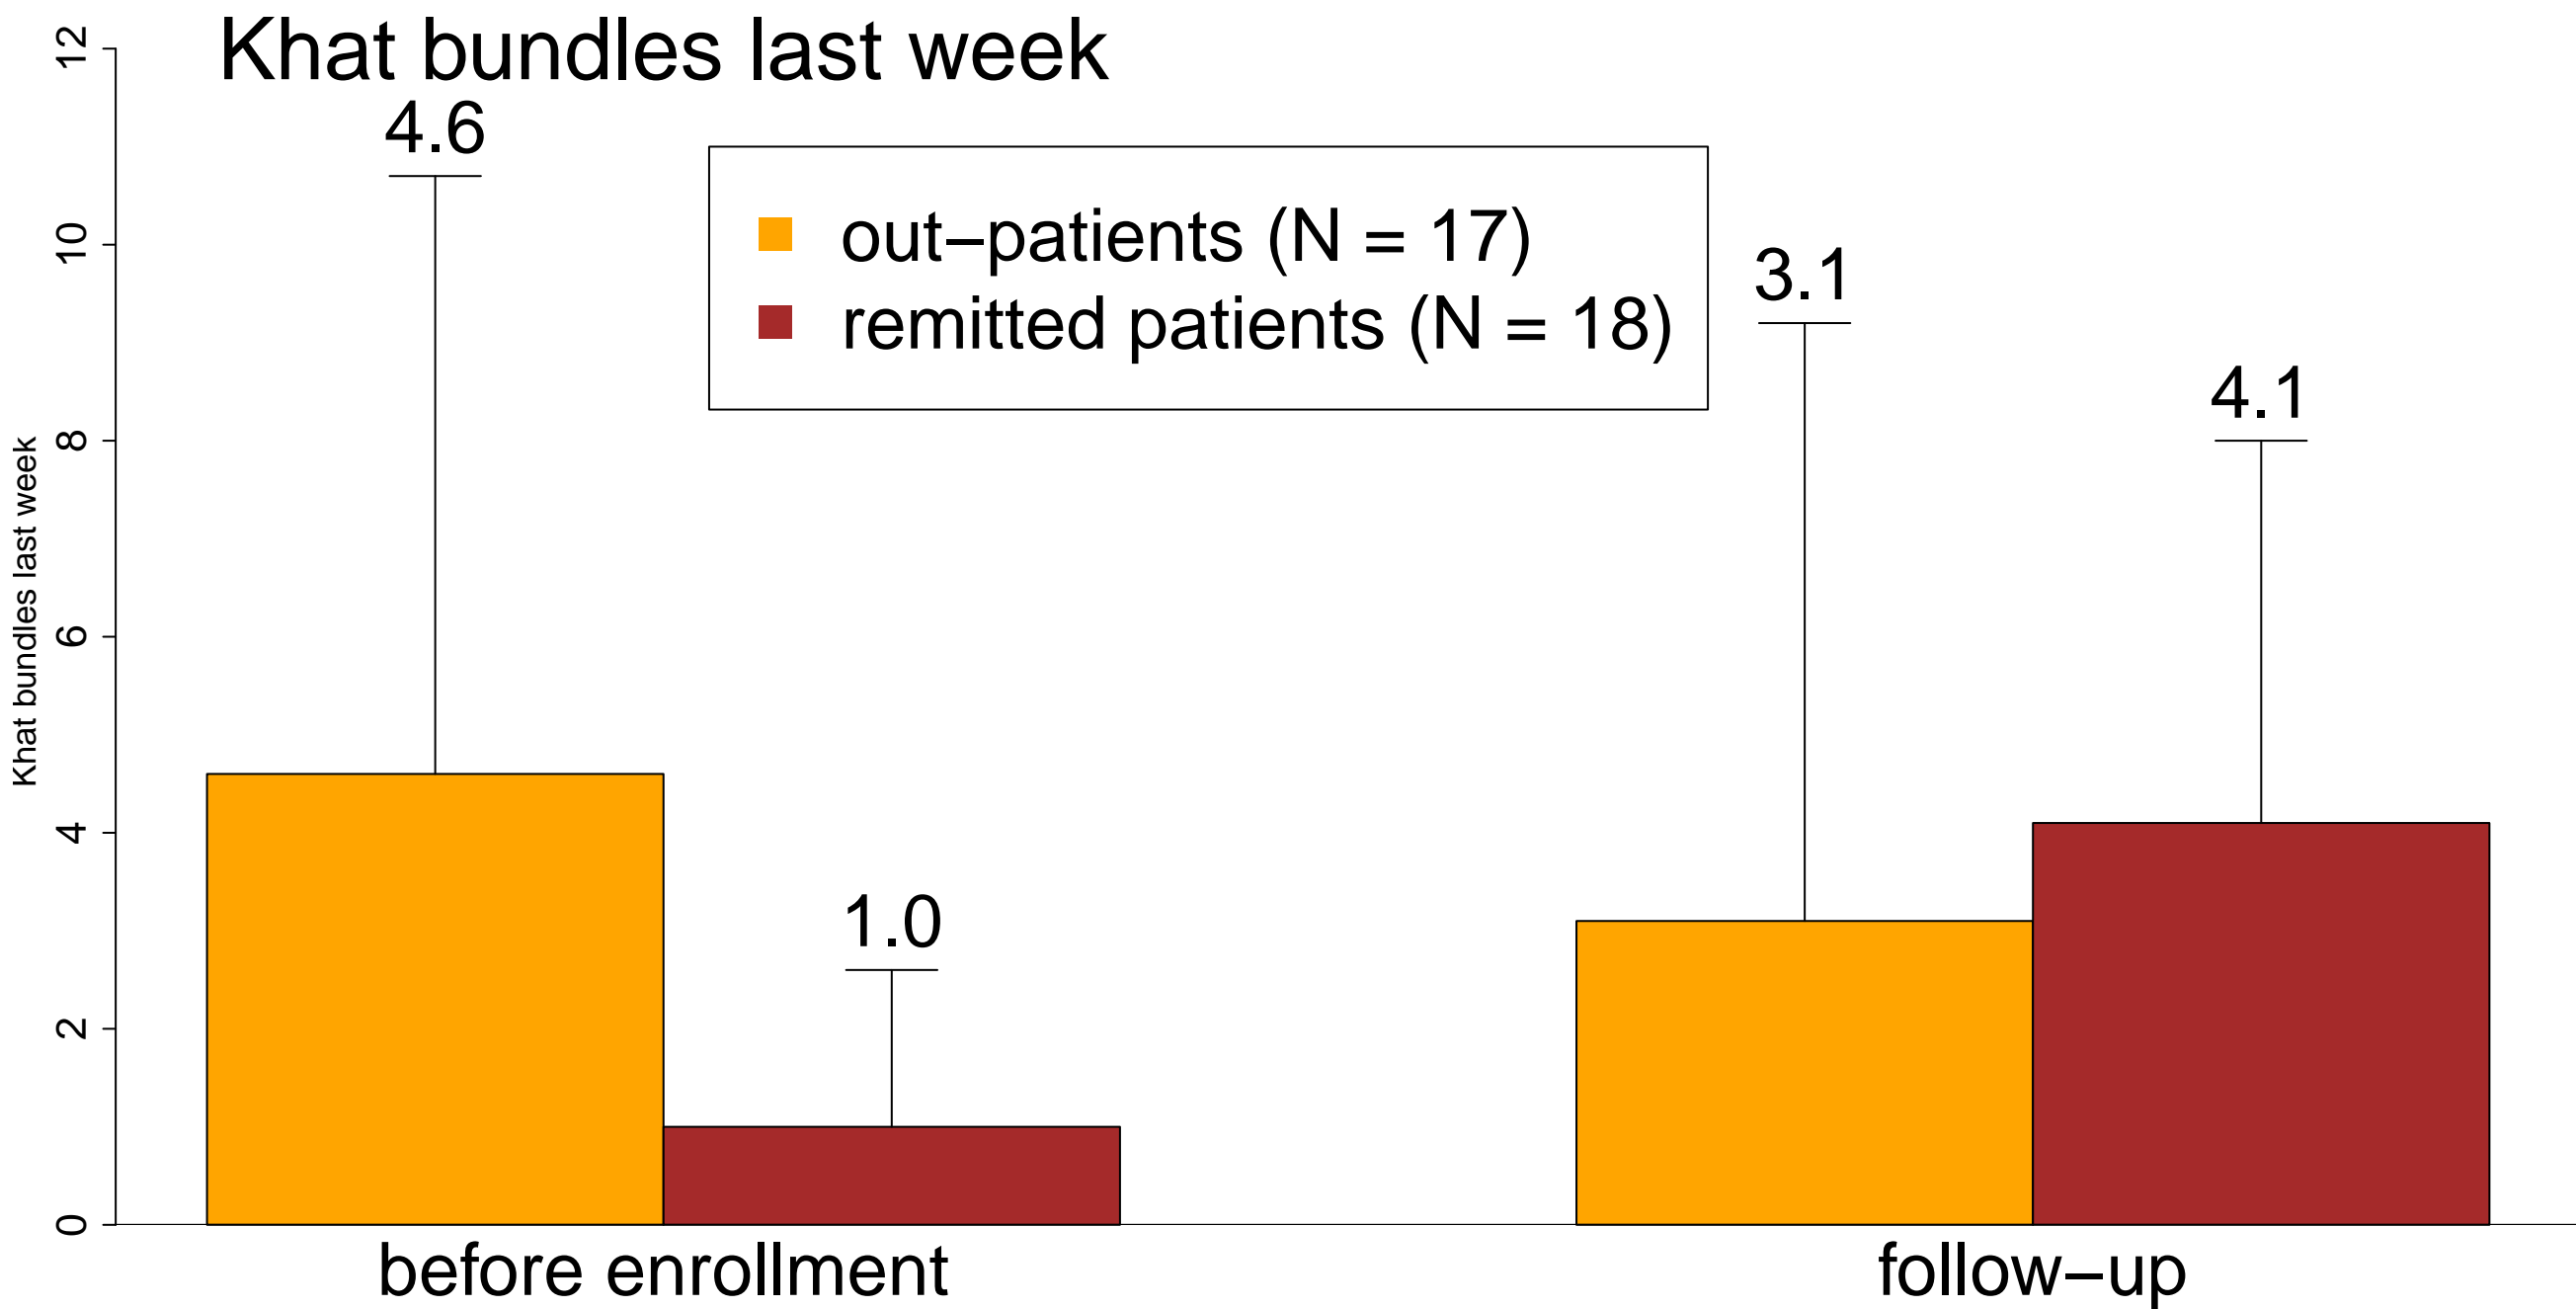

Supplement: MOESM4 [file 9651916]
